# Supplementary material
Source: PubMed Central journal article supplement (PMC3512387)
Supplement: emboj2012288s3.pdf [file emboj2012288s3.pdf]

Source data file: Fig. 3B

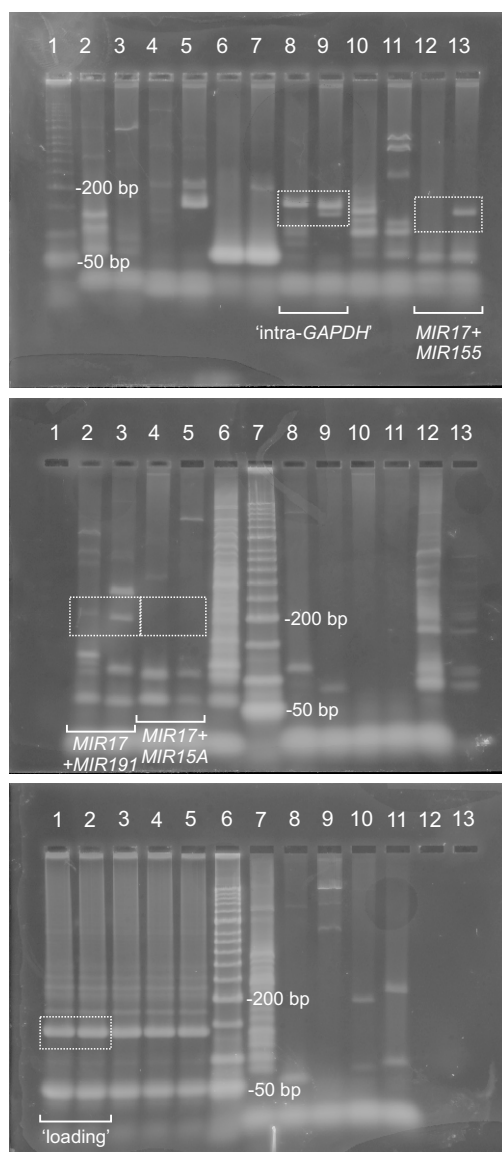

Numbers 1-13 denote lanes; lanes 1,7, and 7 (from top to bottom) contain the 50-bp DNA ladder (NEB), with the 50- and 200-bp bands indicated; lanes corresponding to sub-panels in Fig. 3B are denoted; dotted-line boxes show those parts of the gels that were cropped and presented.
